# Supplementary material for: Canady Cold Helios Plasma Reduces Soft Tissue Sarcoma Viability by Inhibiting Proliferation, Disrupting Cell Cycle, and Inducing Apoptosis: A Preliminary Report
Source: MDPI journal article supplement (doi:10.3390/molecules27134168), 2022-06-29
Supplement: s1 [file s1]

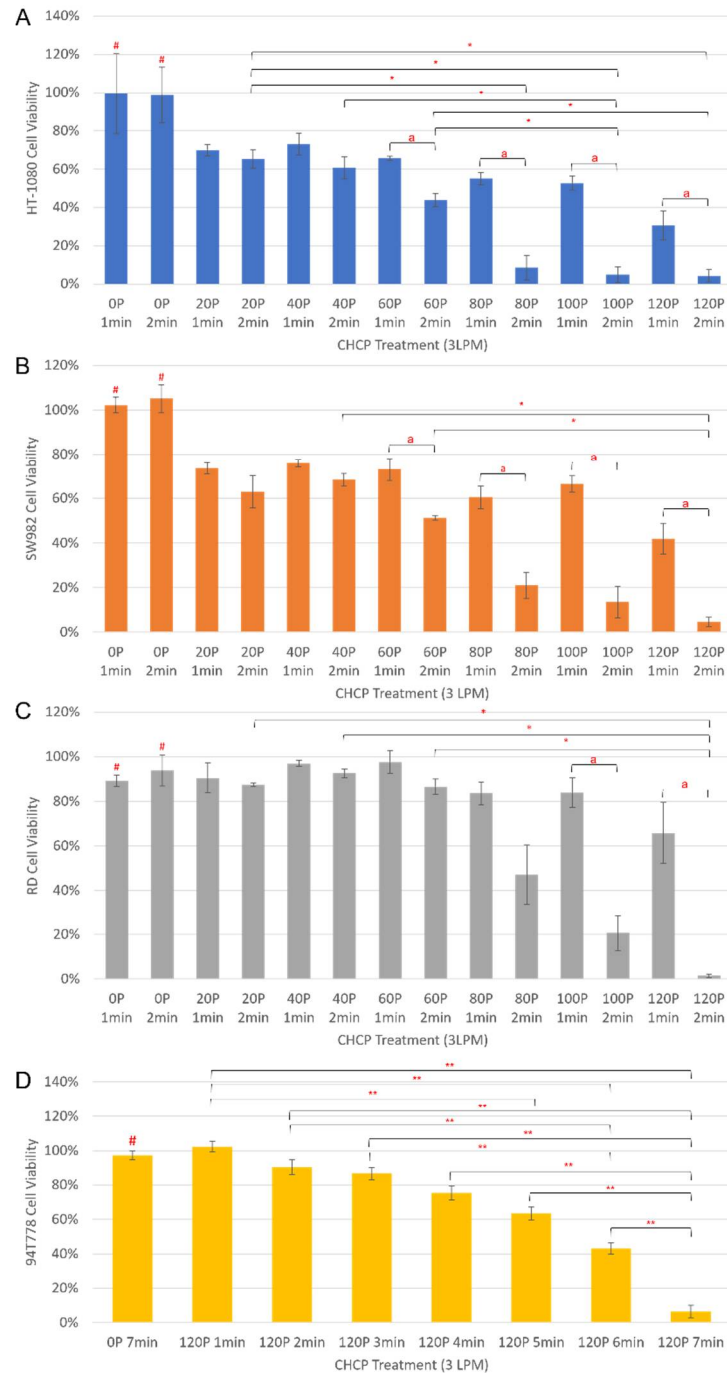

**Figure S1.** Bar graphs (taken from Figure 1 and Figure 2) showing the cell viability of **(A)** HT-1080, **(B)** SW982, **(C)** RD and **(D)** 94T778 cells 48-hour post-CHCP treatment compared to mock controls. Statistical significance for 1 min versus 2 min treatment (<sup>a</sup>  $p \leq 0.05$ ) was considered using a student t-test for **(A)** HT-1080, **(B)** SW982, and **(C)** RD cells. Statistical significance between different powers (20-120 P) (<sup>\*</sup>  $f \leq 0.0033$ ) were considered using a Post-Hoc test for **(A)** HT-1080, **(B)** SW982, and **(C)** RD cells. These tests did not find statistical difference for cells treated with a helium flow rate of 1 LPM, thus is not shown. Statistical significance between different treatment durations (1-7 min) (<sup>\*\*</sup>  $f \leq 0.002381$ ). Statistical significance was not considered (#) for Helium alone (0P) controls.
